# Supplementary material
Source: PubMed Central journal article supplement (PMC5865041)

**Supplemental Table 1:** Treatment groups. Mice were randomly assigned in groups of 10 to each of the 4 treatment groups or the infected untreated group.

| <b>Group</b>          | <b>Antigen</b> | <b>Adjuvant</b> | <b>Benznidazole</b> |
|-----------------------|----------------|-----------------|---------------------|
| Infected Untreated    | None           | None            | None                |
| Vaccine Only          | 25µg Tc24 C4   | 5µg E6020 SE    | None                |
| Low BNZ               | None           | None            | 25mg/kg             |
| Combination Treatment | 25µg Tc24 C4   | 5µg E6020 SE    | 25mg/kg             |
| High BNZ              | None           | None            | 100 mg/kg           |

**Supplemental Figure 1:** Correlation analysis for cytokines and parasitemia. Correlation analysis was performed to evaluate associations between antigen specific IFN $\gamma$  and IL-4 release and parasitemia as a measure of efficacy. Negative and positive association was considered for alternative hypothesis. P values less than or equal to 0.05 were considered significant. There were no statistically significant correlations between IFN  $\gamma$  and parasitemia for the vaccine only (Panel A), low BNZ (Panel B) or High BNZ (Panel C) groups. There were also no statistically significant correlations between IL-4 and parasitemia for the vaccine only (Panel D), low BNZ (Panel E) or High BNZ (Panel F) groups.

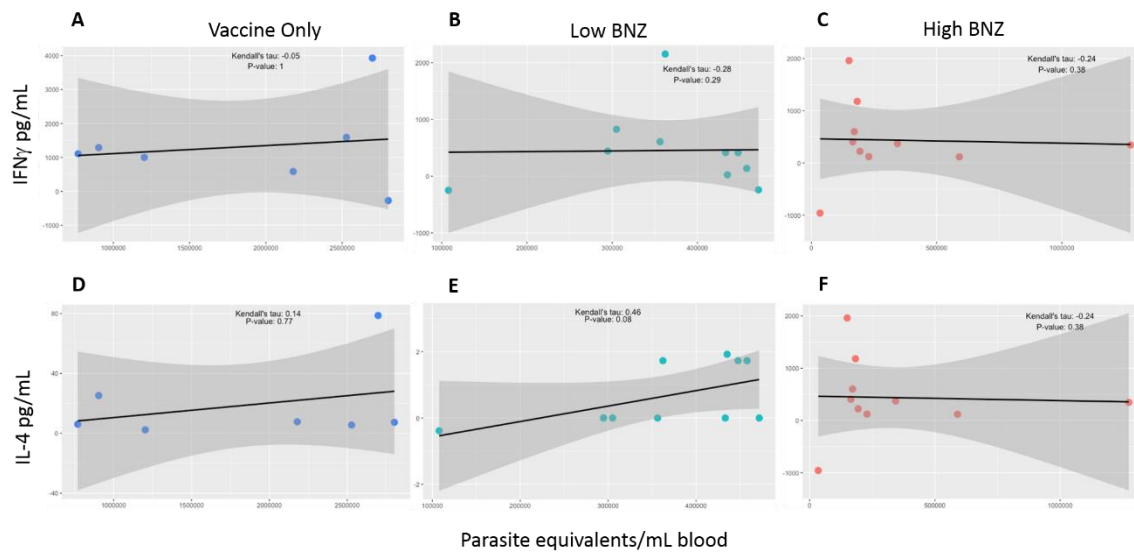

**Supplemental Figure 2:** Correlation analysis for cytokines and cardiac parasite burdens.

Correlation analysis was performed to evaluate associations between antigen specific IFN $\gamma$  and IL-4 release and parasitemia as a measure of efficacy. Negative and positive association was considered for alternative hypothesis. P values less than or equal to 0.05 were considered significant. There were no statistically significant correlations between IFN  $\gamma$  and cardiac parasite burdens for the vaccine only (Panel A), low BNZ (Panel B) or High BNZ (Panel C) groups. There were also no statistically significant correlations between IL-4 and cardiac parasite burdens for the vaccine only (Panel D), low BNZ (Panel E) or High BNZ (Panel F) groups.

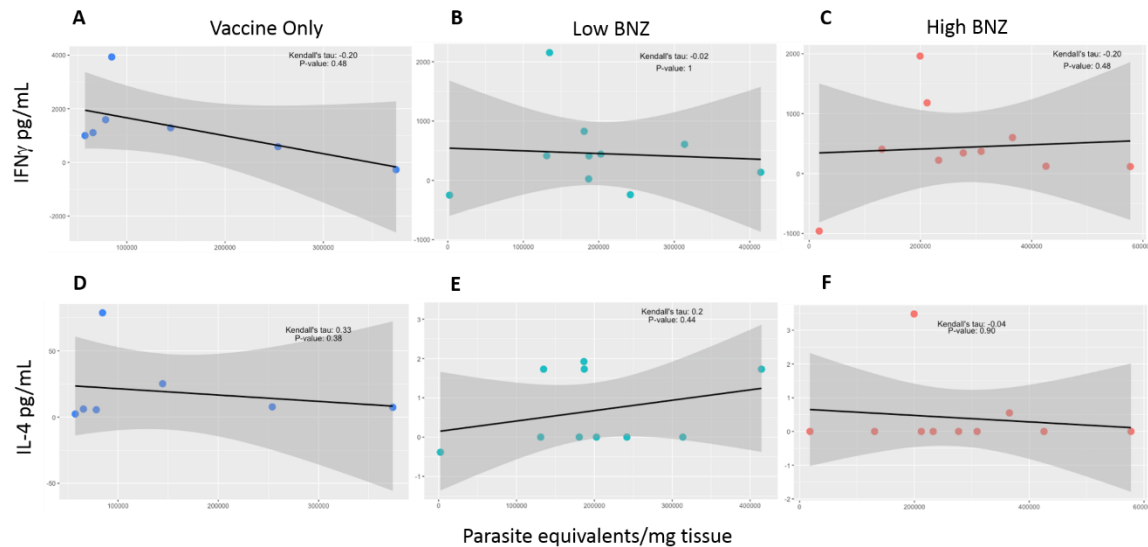

Supplement: IAI.00876-17_zii999092334s1.pdf [file IAI.00876-17_zii999092334s1.pdf]
